# Supplementary material
Source: publisher site journal article supplement (https://www.dovepress.com/article/459583)
Supplement: Supplementary file 1 [file get_supplementary_file.php]

**Supplementary Tables and figures**

**Table S1.** International Society on Thrombosis and Hemostasis and sepsis-induced coagulopathy scoring systems for disseminated intravascular coagulopathy diagnosis

| **Items** | **ISTH DIC** | **SIC** | **Points** |
| --- | --- | --- | --- |
| Platelet count (×10^9/L) | ≥ 100  50 ‑ 100  < 50 | ≥ 150  100 ‑ 150  < 100 | 0  1  2 |
| D‑Dimer elevation or  FDP elevation (mg/L) | < 2 times ULN or < 10  2 ‑ 4 times ULN or 10 - 25  > 4 times ULN or > 25 | -  -  - | 0  2  3 |
| PT prolongation (s)/  INR increase | < 3  3‑6  ≥ 3 | < 1.2  1.2 ‑ 1.4  ≥ 1.4 | 0  1  2 |
| Fibrinogen (g/L) | > 1  < 1 | -  - | 0  1 |
| SOFA score | -  -  - | 0  1  ≥ 2 | 0  1  2 |

**Abbreviations:** Overt DIC: ISTH score ≥5, early stages of DIC: SIC score ≥4. DIC: Disseminated intravascular coagulopathy; ISTH: International Society on Thrombosis and hemostasis; SIC: Sepsis‑induced coagulopathy; FDP: Fibrin degradation products; PT: Prothrombin time; INR: International normalized ratio; SOFA: Sequential organ failure assessment.

**Table S2. Baseline characteristics of the participants and outcome parameters**

| **Variable** | **Training cohort** | **Validation cohort** | **χ2/ Z** | ***P-*value** |
| --- | --- | --- | --- | --- |
| Number | 119 | 51 | - | - |
| Age, years | 70.47 ± 15.20 | 70.65 ± 17.26 | -0.286 | 0.775 |
| Sex(n，male/female) | 72/47 | 32/19 | 0.069 | 0.792 |
| AKI stage n (%) |  | - | 2.381 | 0.304 |
| 1 | 42(35.29) | 13(30.95) | - | - |
| 2 | 35(29.41) | 14(27.45) | - | - |
| 3 | 42(35.29) | 24(47.06) | - | - |
| **Site of infection** |  | - | - | - |
| Lung n (%) | 74(62.18) | 32(62.75) | 0.005 | 0.945 |
| Abdominal cavity n (%) | 24(20.17) | 7(13.73) | 0.994 | 0.319 |
| Urinary n (%) | 28(23.53) | 7(13.73) | 2.099 | 0.147 |
| Skin soft tissue n (%) | 7(5.88) | 2(3.92) | 0.274 | 0.601 |
| Blood n (%) | 15(12.61) | 12(23.53) | 3.189 | 0.074 |
| Two or more | 30(25.21) | 15(29.41) | 0.324 | 0.569 |
| **Pathogen** |  | - | - | - |
| Gram-negative bacteria n (%) | 78(65.55) | 31(60.78) | 0.352 | 0.533 |
| Gram-positive bacteria n (%) | 26(21.85) | 11(21.57) | 0.002 | 0.968 |
| Fungi n (%) | 30(25.21) | 17(33.33) | 1.178 | 0.278 |
| No infectious organism n (%) | 30(25.21) | 14(27.45) | 0.093 | 0.760 |
| **Interventions** |  | - | - | - |
| RRT n (%) | 61(51.26) | 28(54.90) | 0.674 | 0.412 |
| Mechanical ventilation n (%) | 53(44.54) | 27(52.94) | 1.012 | 0.314 |
| Vasoactive drug n (%) | 74(62.18) | 30(58.82) | 0.170 | 0.680 |
| **Comorbidities** |  | - | - | - |
| Hypertension n (%) | 67(56.30) | 19(37.25) | 5.182 | 0.023 |
| Diabetes mellitus n (%) | 40(33.61) | 11(21.57) | 2.466 | 0.116 |
| Malignant cancer n (%) | 28(23.53) | 9(17.65) | 0.725 | 0.394 |
| Septic shock n (%) | 68(57.14) | 33(64.71) | 1.149 | 0.284 |
| MODS n (%) | 55(46.22) | 24(47.06) | 0.010 | 0.920 |
| Coagulation abnormal n (%) | 94(78.99) | 41(80.39) | 0.043 | 0.836 |
| DIC n (%) | 33(27.73) | 16(31.37) | 0.231 | 0.631 |
| SIC n (%) | 115(96.64) | 47(92.16) | 1.599 | 0.206 |
| **Scoring system** |  |  |  |  |
| SOFA | 7.00(4.00, 10.00) | 8.00(5.00, 11.00) | -1.008 | 0.313 |
| APACHE II | 16.00(11.00, 21.00) | 17.00(13.00, 27.0) | -1.243 | 0.213 |
| **Laboratory results** |  |  |  |  |
| PLT (×10^9/L) | 114.00(61.00, 189.00) | 103.00(61.00, 179.00) | -0.282 | 0.778 |
| CRP (mg/L) | 121.39 ± 104.09 | 148.69 ± 175.47 | -0.542 | 0.588 |
| PCT (ng/ml) | 7.28(1.37, 19.26) | 5.10(0.99, 23.49) | -0.655 | 0.513 |
| ALT (U/L) | 25.00(13.00, 58.00) | 23.50(14.25, 61.75) | -0.165 | 0.869 |
| AST (U/L) | 35.00(20.00, 72.00) | 36.00(19.00, 65.75) | -0.408 | 0.683 |
| TBIL (mg/dl) | 13.10(8.40, 26.00) | 14.50(8.03, 28.83) | -0.525 | 0.599 |
| DBIL (mg/dl) | 7.20(4.00, 16.70) | 7.80(3.93, 20.15) | -0.667 | 0.505 |
| ALB (g/L) | 30.28 ± 5.30 | 29.36 ± 4.83 | -1.178 | 0.239 |
| Urea (mmol/L) | 18.16 ± 10.87 | 16.32 ± 9.71 | -1.117 | 0.264 |
| SCr (μmoI/L) | 145.40(116.30, 212,70) | 145.90(110.50, 245.70) | -0.026 | 0.980 |
| CysC (mg/L) | 2.22 ± 1.05 | 1.99 ± 1.07 | -1.337 | 0.181 |
| NT-ProBNP (ng/L) | 2769.00(923.50, 9367.50) | 2674.00(1065.00, 7495.00) | -0.136 | 0.892 |
| Lactate (mmol/L) | 3.89 ± 3.25 | 6.27 ± 5.34 | -2.494 | 0.013 |
| D-D (ng/ml) | 5.67(3.27, 8.77) | 6.40(2.85, 12.88) | -0.660 | 0.509 |
| TT (s) | 15.70(14.50, 17.90) | 16.60(14.60, 19.20) | -0.977 | 0.329 |
| PT (s) | 14.40(12.90, 16.60) | 15.00(13.40, 18.50) | -1.504 | -0.133 |
| APTT (s) | 42.24 ± 18.76 | 44.34 ± 20.08 | -0.420 | 0.674 |
| Fibrinogen (g/L) | 4.67 ± 3.35 | 3.74 ± 2.07 | -1.874 | 0.061 |
| INR | 1.25(1.13, 1.52) | 1.27(1.14, 1.65) | -0.806 | 0.420 |

**Notes:** Data are presented as the mean ± SD or median (IQR) for skewed variables or numbers (proportions) for categorical variables.

**Abbreviations:** AKI: acute kidney injury; MODS: multiple o-rgan dysfunction syndrome; SIC: sepsis-induced coagulopathy; DIC: disseminated intravascular coagulation; SOFA: Sequential Organ Failure Assessment; APACHE II: Acute Physiology and Chronic Health Evaluation II; RRT: renal replacement treatment; PLT: Platelet platelet count; CRP: C-reactive protein; PCT: procalcitonin; TBIL: total bilirubin; DBIL: direct bilirubin; ALT: alanine aminotransferase; AST: alanine transaminase; SCr: serum creatinine; NT-proBNP: N-terminal brain natriuretic peptide-precursor; D-D: D-dimer; PT: prothrombin time; APTT: activated partial thromboplastin time; TT: thrombin time; INR: international normalized ratio.

**Table S3.** Univariate cox analysis of pathogens and 28-day prognosis

| **Variable(s)** | **β** | **S.E.** | **HR** | **95%CI** | ***P*-value** |
| --- | --- | --- | --- | --- | --- |
| Gram-negative bacteria | 0.091 | 0.388 | 1.095 | 0.512 - 2.343 | 0.815 |
| Gram-positive bacteria | 0.238 | 0.444 | 1.268 | 0.531 - 3.030 | 0.593 |
| Fungi | 0.293 | 0.429 | 0.495 | 0.322 - 1.729 | 0.495 |
| No infectious organism | -1.174 | 0.445 | 3.235 | 1.354 - 7.732 | 0.008 |

**Table S4.** Relationship between APTT and 28-day mortality

|  | **Low level (**< **37.7 s)** | | **High level (≥ 37.7 s)** | |
| --- | --- | --- | --- | --- |
|  | **HR (95% CI)** | ***P*-value** | **HR (95% CI)** | ***P*-value** |
| Unadjusted | 1.023(0.940 - 1.113) | 0.593 | 1.017(1.001 - 1.032) | 0.033 |
| Model 1 | 0.999(0.917 - 1.088) | 0.974 | 1.030(1.009 - 1.050) | 0.004 |

Abbreviations: Model 1 adjusted for Lac, APACHEⅡ, CRP.
